# Supplementary material for: A new phenothiazine derivative inhibits human cancer through targeting master gene PELP1
Source: Research Square preprint supplement (doi:10.21203/rs.3.rs-7521996/v1), 2025-09-08
Supplement: Supplementary file 1 [file 21aaccb93b61df9823e035df.docx]

4.08

35

34

33

21

32

29

31

30

9.0

8.5

8.0

2.03

7.5

4.00

2.00

7.0

0.55

1.99

1.99

6.5

6.0

5.5

f1 (ppm)

7.71

7.69

5

9

7.69

7.68

7.68

7.66

7.66

38

7.53

37

7.53

7.52

36

7.51

7.51

7.50

7.50

7.49

7.49

7.46

7.45

7.44

7.44

7.43

7.42

7.42

7.42

7.28

7.18

7.17

7.16

7.14

7.14

7.13

7.13

7.11

7.11

7.02

7.00

6.96

6.96

6.94

6.94

6.93

6.92

6.90

6.90

6.88

6.88

6.83

6.81

6.79

6.78

3.84

5.0

4.5

4.0

2.00 3.82

3.81

3.5

2.57

3.0

2.5

2.03

2.0

2.06

1.5

1.0

0.5

2.32

2.30

2.30

2.28

2.28

2.27

2.26

1.95

1.93

1.91

1.90

1.88

1.81

1.80

1.79

1.78

1.77

1.76

1.75

1.74

20000

19000

18000

17000

16000

15000

14000

13000

12000

11000

10000

9000

8000

7000

6000

5000

4000

3000

2000

1000

0

-1000

0.0


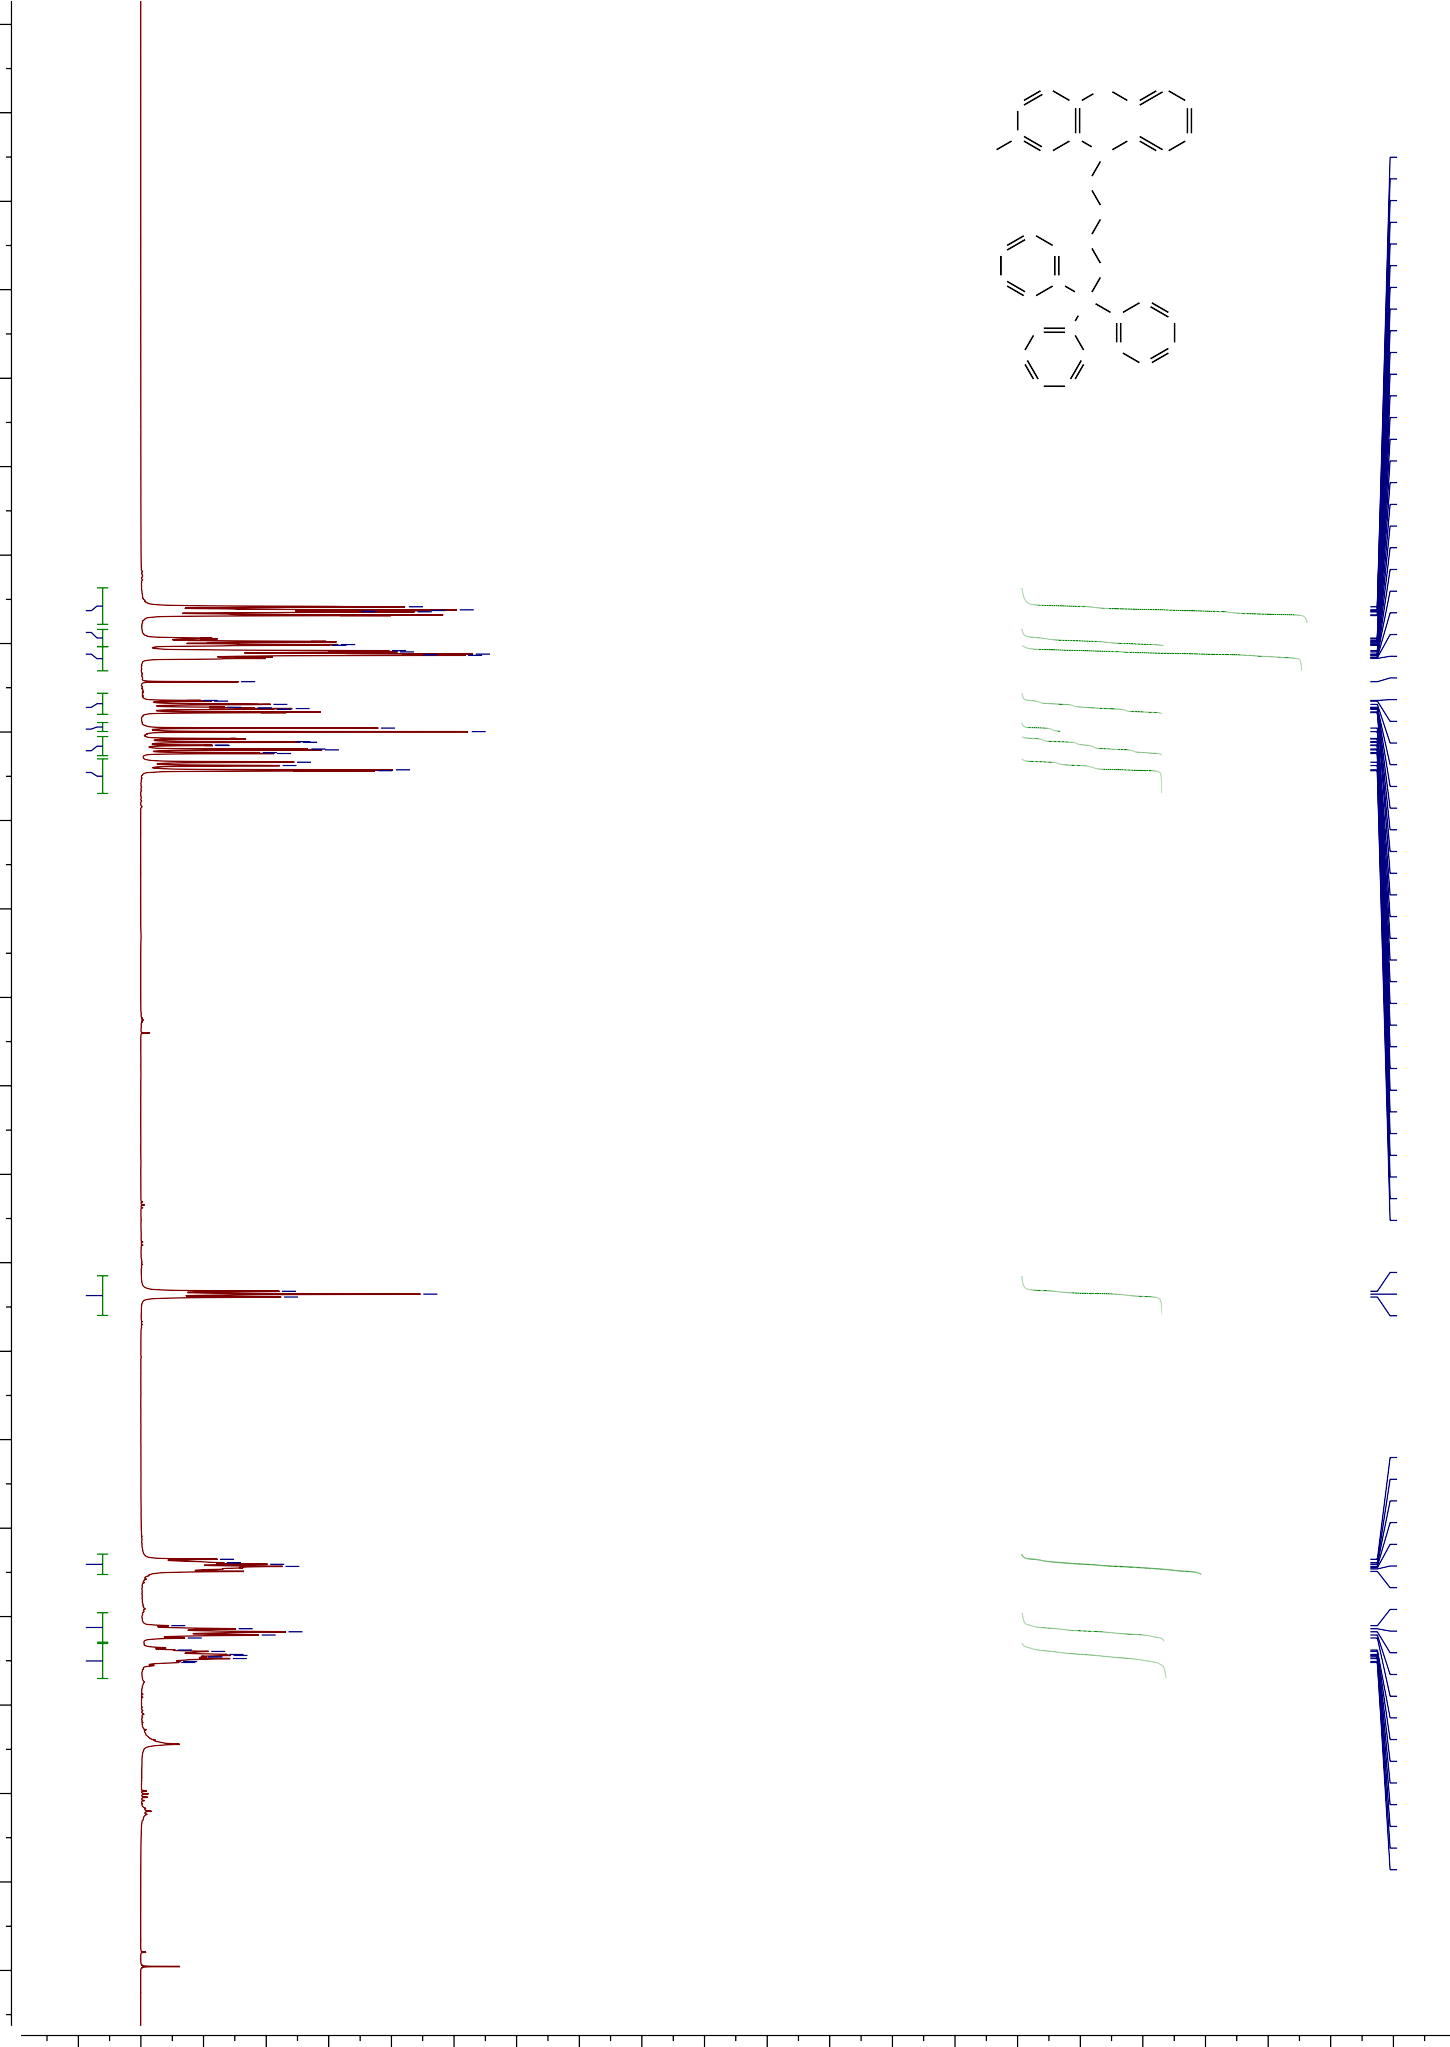


LWJ-3-1h方法一

2 1

3 6

4

23

s

7

N

10

17

19

16

18

PH

20

8

24

22

11

14

25

28

12

13

26

27

Cl

15

H NMR spectroscopy

11.0

10.5

10.0

9.5


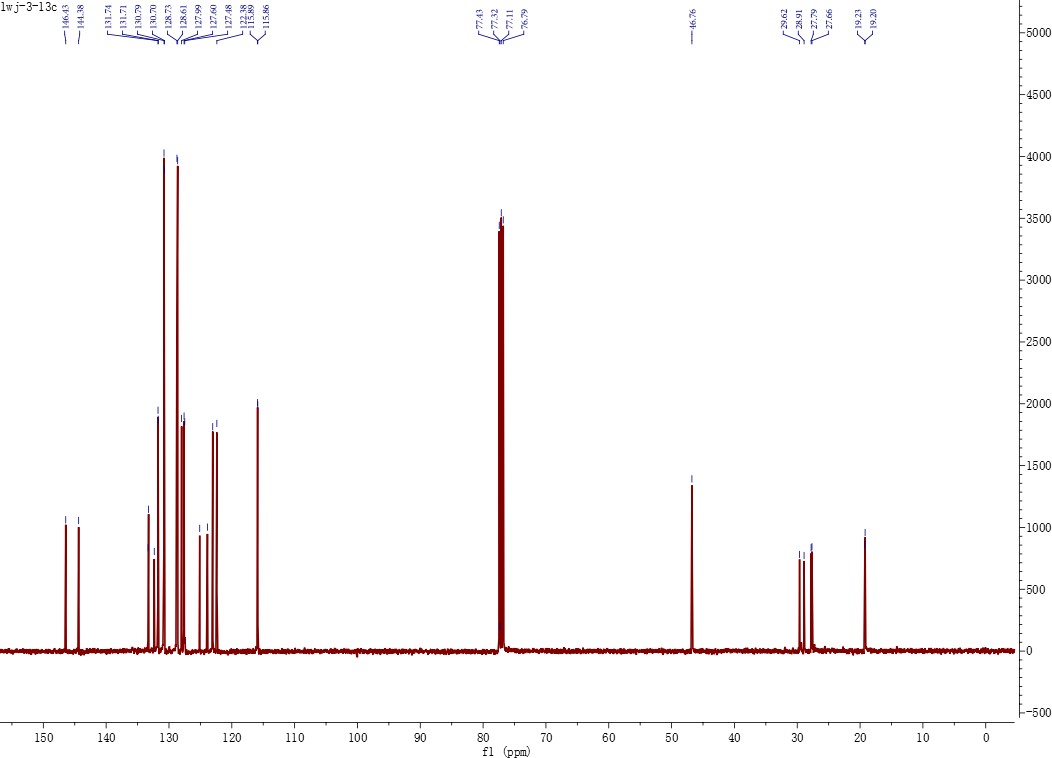


**Cl**

**P N S**

Carbon NMR Spectroscopy

| 100 550.3 **Cl** Max: 2.50966e+006  90  **P N S**  80  70  60  50 552.3  40 551.3  30  20  553.2  400 600 800 1000 1200 1400 1600 1800 m/z | | | | | | | | | |
| --- | --- | --- | --- | --- | --- | --- | --- | --- | --- |
| Sample Description |  |  |  |  | Instrument | Agilent-6125B | |  |  |
| Analyzed date: | 2019-03-25 |  |  |  | Probe: | ESI |  | Probe Bias: | ＋4.5kv |
| Analyst: | YU |  |  |  | Nebulizer Gas Flow: | 1.5L/min | | Detector: | 1.5kv |
| Sample: |  |  |  |  | CDL: | -20.0v | | T. Flow: | 0.2ml/min |
| M.W.: | 632 |  |  |  | CDL Temp.: | 250 | oC | B. Conc.: | 50%H2O/50%ACN |
| Lot. No.: |  |  |  |  | Block Temp.: | 200 | oC |  |  |

**MASS SPECTROMETRY REPORT**

数据文件: D:\LWJ\DATA\181021分噻嗪\DEF_LC 2018-10-21 19-28-51\071-0101.D

样品名称: 分噻嗪纯品

=====================================================================

操作者 : 系统 序列行 : 1

仪器 : 1220 Infinity LC 位置 : 样品瓶 71

进样日期 : 2018/10/21 19:29:40 进样次数 : 1

进样量 : 5.000 µl

采集方法 : D:\LWJ\DATA\181021分噻嗪\DEF_LC 2018-10-21 19-28-51\181021分噻嗪改造5UL-

80甲醇.M

最后修改 : 2018/10/21 19:36:52 : 系统

(调用后修改)

分析方法 : D:\LWJ\DATA\181021分噻嗪\DEF_LC 2018-10-21 19-28-51\181021分噻嗪改造5UL-

80甲醇.M (序列方法)

最后修改 : 2018/10/21 19:28:51 : 系统

VWD1 A, Wavelength=254 nm (D:\LWJ\DATA\181021分噻嗪\DEF_LC 2018-10-21 19-28-51\071-0101.D)

mAU

3500

3000

2500

2000

1500

1000

500

0

2.5

5

7.5

10

12.5

15

17.5

20

22.5

min

15.894

=====================================================================

0.259

0.535

2.720

2.943

3.455682

3.979

4.409

4.877

7.365

9.559

10.419

13.414

面积百分比报告

=====================================================================

| 排序 : | 信号 |  |
| --- | --- | --- |
| 乘积因子 | : | 1.0000 |
| 稀释因子  内标使用乘积因子和稀释因子 | : | 1.0000 |

信号 1: VWD1 A, Wavelength=254 nm

峰 保留时间 类型 峰宽 峰面积 峰高 峰面积

# [min] [min] [mAU*s] [mAU] %

----|-------|----|-------|----------|----------|--------| 1 0.259 BV 0.0772 27.75537 5.12738 0.0185

2 0.535 VB 0.4317 150.56622 4.61367 0.1001

3 2.720 BB 0.1107 19.49681 2.85268 0.0130

4 2.943 BB 0.1208 114.45724 13.78908 0.0761

5 3.458 BV 0.0742 47.07859 9.59540 0.0313

6 3.562 VB 0.0864 92.84705 16.06964 0.0617

数据文件: D:\LWJ\DATA\181021分噻嗪\DEF_LC 2018-10-21 19-28-51\071-0101.D

样品名称: 分噻嗪纯品

峰 保留时间 类型 峰宽 峰面积 峰高 峰面积

# [min] [min] [mAU*s] [mAU] %

----|-------|----|-------|----------|----------|--------| 7 3.979 BB 0.1578 45.40697 3.95791 0.0302

8 4.409 BV 0.1192 13.71829 1.79443 9.119e-3

9 4.877 VB 0.2388 219.82448 12.40255 0.1461

10 7.365 BB 0.1773 20.26318 1.76072 0.0135

11 9.559 BB 0.2564 73.40698 4.40438 0.0488

12 10.419 BB 0.2634 252.90303 14.64951 0.1681

13 13.414 BB 0.3549 98.60421 4.13883 0.0655

14 15.894 VB 0.5873 1.49256e5 3537.45068 99.2180

总量 : 1.50433e5 3632.60687

=====================================================================

*** 报告结束 ***

Table of RNA sequence

Table 1: siRNA sequence

| Name | Sense(5’-3’) | Antisense(5’-3’) |
| --- | --- | --- |
| Negative control | UUCUCCGAACGUGUCACGUTT | ACUUGACACGUUCGAAGAATT |
| siRNA1 | GUCAGUAGCAAGAAUAUUATT | UAAUAUUCUUGCUACUGACTT |
| siRNA2 | GGCUUGUGGUUCUCUCAAATT | UUUGAGAGAACCACAAGCCTT |
| siRNA3 | CAAGGUGUAUGCGAUAUUATT | UAAUAUCGCAUACACCUUGTT |

Table 2: saRNA sequence

| Name | Sense(5’-3’) | Antisense(5’-3’) |
| --- | --- | --- |
| Negative control | ACUUACGAGUGACAGUAGA[dT][d  T] | UCUACUGUCACUCGUAAGU[dT][dT] |
| saPELP1-142 | AGAGCGAGACUCCGUCUCA[dT][dT  ] | CCUCGCUCUGAGGCAGAGU[dT][dT] |
| saPELP1-191 | AGGUUGCGGUGAGCCGAGA[dT][d  T] | UCCAACGCCACUCGGCUCU[dT][dT] |
| saPELP1-247 | UAAUCCCAUCUACUCGGGA[dT][dT  ] | AUUAGGGUAGAUGAGCCCU[dT][dT] |
