# Supplementary material for: A new phenothiazine derivative inhibits human cancer through targeting master gene PELP1
Source: Research Square preprint supplement (doi:10.21203/rs.3.rs-7521996/v1), 2025-09-08
Supplement: Supplementary file 2 [file 94bffdea4a9ad3d2811488ad.docx]

Supplementary table

Table 1: siRNA sequence

| Name | Sense(5’-3’) | Antisense(5’-3’) |
| --- | --- | --- |
| Negative control | UUCUCCGAACGUGUCACGUTT | ACUUGACACGUUCGAAGAATT |
| siRNA1 | GUCAGUAGCAAGAAUAUUATT | UAAUAUUCUUGCUACUGACTT |
| siRNA2 | GGCUUGUGGUUCUCUCAAATT | UUUGAGAGAACCACAAGCCTT |
| siRNA3 | CAAGGUGUAUGCGAUAUUATT | UAAUAUCGCAUACACCUUGTT |

Table 2: saRNA sequence

| Name | Sense(5’-3’) | Antisense(5’-3’) |
| --- | --- | --- |
| Negative control | ACUUACGAGUGACAGUAGA[dT][dT] | UCUACUGUCACUCGUAAGU[dT][dT] |
| saPELP1-142 | AGAGCGAGACUCCGUCUCA[dT][dT] | CCUCGCUCUGAGGCAGAGU[dT][dT] |
| saPELP1-191 | AGGUUGCGGUGAGCCGAGA[dT][dT] | UCCAACGCCACUCGGCUCU[dT][dT] |
| saPELP1-247 | UAAUCCCAUCUACUCGGGA[dT][dT] | AUUAGGGUAGAUGAGCCCU[dT][dT] |
